# Supplementary material
Source: HighWire-hosted journal article supplement (https://ard.bmj.com/content/78/7/879)
Supplement: inline-supplementary-material-1 [file inline-supplementary-material-1.docx]

***Table S1: Nuclear HEp-2 IIFA patterns (further details)***

| **Code** | **AC Pattern – Clinical relevance** | **References** |
| --- | --- | --- |
| AC-3 | *CENTROMERE*   - The AC-3 pattern is found in a subset of patients with SjS; these patients show mild SSc features, but a full-blown SjS clinical feature, more severe exocrine glandular dysfunction, and high risk of lymphoma - The AC-3 pattern is also apparent in a subset of patients with SLE; these patients often have some degree of overlap with SSc - Most sera with the AC-3 pattern react with CENP-A and CENP-B; antibodies to CENP-A can be detected by ELISA or disease specific immunoassays (*i.e.*, SSc profile) - In rare cases AC-3 positive, but CENP-B negative sera of SSc patients may be strongly positive for anti-CENP-A antibodies - Antibodies to CENP-C have been reported in patients with SSc and SjS   *Note: Availability of assays for CENP-A, i.e., ELISA or SSc profile, may be limited to specialty clinical laboratories; specific immunoassays for anti-CENP-C antibodies are currently not commercially available.* | (1-4)  (5)  (6, 7)  (8, 9)  (10-12) |
| AC-5 | *LARGE/COARSE SPECKLED*   - Occasionally, autoantibodies revealing the AC-5 pattern are reactive with RNP other than U1RNP, for instance U2RNP (associated with SSc-AIM overlap syndrome) or U11/U12RNP (associated with SSc); these autoantibodies can be detected by immunoprecipitation   *Note: Specific immunoassays for these autoantibodies are currently not commercially available.* | (13, 14) |
| AC-7 | *FEW NUCLEAR DOTS*   - Anti-p80-coilin antibodies may rarely occur in SLE, (localized linear) SSc, and SjS - Isolated (without anti-snRNPs) anti-SMN antibodies are reported in patients with AIM or SSc-AIM overlap syndrome - The specificity of antibodies to p80-coilin and the SMN complex can be confirmed by Western blot, solid phase immunoassays using recombinant proteins and immunoprecipitation   *Notes: Most reports describe autoantibodies directly binding to specific antigens (i.e. antigen-specific immunoassays) and do not actually show clear correlations with the AC-7 pattern as such; specific immunoassays for these autoantibodies are currently not commercially available.* | (15-17)  (18)  (15, 18, 19) |
| AC-8 | *HOMOGENEOUS NUCLEOLAR*   - The AC-8 pattern that is the result of the anti-Th/To reactivity is also seen in patients with SLE, UCTD (*i.e.*, patients with rheumatic symptoms without a SARD diagnosis), SSc sine scleroderma, idiopathic interstitial lung disease or pulmonary hypertension - Patients with autoantibodies revealing the AC-8 pattern due to anti-PM/Scl reactivity may have, in addition to the clinical features of AIM and SSc, various clinical manifestations of SLE and SjS | (20, 21)  (22) |
| AC-12 | *PUNCTATE NUCLEAR ENVELOPE*   - Anti-p62 nucleoporin antibodies have been described in PBC and SLE - Anti-LBR antibodies have been described in PBC - Anti-Tpr antibodies have been described in PBC, autoimmune liver disease, SLE, SSc and SjS   *Notes: Most reports describe autoantibodies directly binding to specific antigens (i.e., antigen-specific immunoassays) and do not actually show clear correlations with the AC-12 pattern as such; specific immunoassays for these autoantibodies are currently not commercially available.* | (23, 24)  (25)  (26) |
| AC-13 | *pcna-like*   - A major challenge in deriving an association of the AC-13 pattern with antibodies to the classical 35 kDa PCNA (elongation factor of DNA polymerase delta auxiliary protein) is that “PCNA” is known to be a macromolecular complex where targets other than the ‘classical’ 35 kDa PCNA are present. In addition, a number of other apparently unrelated targets can also produce an AC-13-like pattern by HEp-2 IIFA. | (27) |

**Abbreviations**

AIM, autoimmune myositis; CENP, centromere-associated protein; DNA, desoxyribonucleic acid; ELISA, enzyme-linked immunosorbent assay; IIFA, indirect immunofluorescence assay; LBR, lamin B receptor; PBC, primary biliary cholangitis; PCNA, proliferating cell nuclear antigen; PM/Scl, polymyositis-scleroderma; RNP, ribonucleoprotein; SARD, systemic autoimmune rheumatic disease; SjS, Sjögren’s syndrome; SLE, systemic lupus erythematosus; SMN, survival of motor neuron; SSc, systemic sclerosis; Tpr, translocated promotor region; UCTD, undifferentiated connective tissue disease

**References**

1. Vasiliki-Kallipi KB, Diamanti KD, Vlachoyiannopoulos PG, et al. Anticentromere antibody positive Sjögren’s Syndrome: a retrospective descriptive analysis. *Arthritis Res Ther* 2010;12:R47.
2. Lee KE, Kang JH, Lee JW, et al. Anti-centromere antibody-positive Sjögren’s syndrome: a distinct clinical subgroup? *Int J Rheum Dis* 2015;18:776-82.
3. Baldini C, Mosca M, Della Rossa A, et al. Overlap of ACA-positive systemic sclerosis and Sjögren’s syndrome: a distinct clinical entity with mild organ involvement but a high risk of lymphoma. *Clin Exp Rheumatol* 2013;31:272-80.
4. Baer AN, Medrano L, McAdams-Demarco M, et al. Association of anticentromere antibodies with more severe exocrine glandular dysfunction in Sjögren’s syndrome: analysis of the Sjögren’s International Collaborative Clinical Alliance Cohort. *Arthritis Care Res* 2016;68:1554-9.
5. Nakano M, Ohuchi Y, Hasegawa H, et al. Clinical significance of anticentromere antibodies in patients with systemic lupus erythematosus. *J Rheumatol* 2000;27:1403-7.
6. Perosa F, Prete M, Di Lernia G, et al. Anti-centromere protein A antibodies in systemic sclerosis: significance and origin. *Autoimmun Rev* 2016;15:102-9.
7. Mahler M, Maes L, Blockmans D, et al. Clinical and serological evaluation of a novel CENP-A peptide based ELISA. *Arthritis Res Ther* 2010;12:R99.
8. Russo K, Hoch S, Varga J, et al. Circulating anticentromere CENP-A and CENP-B antibodies in patients with diffuese and limited systemic sclerosis, systemic lupus erythematosis, and rheumatoid arthritis. *J Rheumatol* 2000;27:142-8.
9. Hudson M, Mahler M, Pope J, et al. Clinical correlates of CENP-A and CENP-B antibodies in a large cohort of patients with systemic sclerosis. *J Rheumatol* 2012;39:787-94.
10. Pillemer SR, Casciola-Rosen L, Baum BJ, et al. Centromere protein C is a target of autoantibodies in Sjogren's syndrome and is uniformly associated with antibodies to Ro and La. *J Rheumatol* 2004;31:1121-5.
11. Gelber AC, Pillemer SR, Baum BJ, et al. Distinct recognition of antibodies to centromere proteins in primary Sjogren's syndrome compared with limited scleroderma. *Ann Rheum Dis* 2006;65:1028-32.
12. Tanaka N, Muro Y, Suzuki Y, et al. Anticentromere antibody-positive primary Sjogren's syndrome: Epitope analysis of a subset of anticentromere antibody-positive patients. *Mod Rheumatol* 2017;27:115-21.
13. Mimori T, Hinterberger M, Pettersson I, et al. Autoantibodies to the U2 small nuclear ribonucleoprotein in a patient with scleroderma-polymyositis overlap syndrome. *J Biol Chem* 1984;259:560-5.
14. Fretig N, Domsic RT, Rodriguez-Reyna T, et al. Anti-U11/U12 RNP antibodies in systemic sclerosis: a new serologic marker associated with pulmonary fibrosis. *Arthritis Rheum* 2009;61:958-65.
15. Andrade LE, Chan EK, Raska I, et al. Human autoantibody to a novel protein of the nuclear coiled body: immunological characterization and cDNA cloning of p80-coilin. *J Exp Med* 1991;173:1407-19.
16. Fujimoto M, Kikuchi K, Tamaki T, et al. Distribution of anti-p80-coilin autoantibody in collagen diseases and various skin diseases. *Br J Dermatol* 1997;137:916-20.
17. Onouchi H, Muro Y, Tomita Y. Clinical features and IgG subclass distribution of anti-p80 coilin antibodies. *J Autoimmun* 1999;13:225-32.
18. Satoh M, Chan JY, Ross SJ, et al. Autoantibodies to survival of motor neuron (SMN) complex in patients with polymyositis – immunoprecipitation of D-E-F-G without other components of small nuclear ribonucleoproteins. *Arthritis Rheum* 2011;63:1972-8.
19. Amlani A, Hazlewood GS, Hamilton L, et al. Autoantibodies to the survival of motor neuron complex in a patient with necrotizing autoimmune myopathy. *Rheumatology* 2018;57:199-200.
20. Fischer A, Pfalzgraf FJ, Feghali-Bostwick CA, et al. Anti-Th/To-Positivity in a Cohort of Patients with Idiopathic Pulmonary Fibrosis. *J Rheumatol* 2006;33:1600-1605.
21. Fischer A, Meehan RT, Feghali-Bostwick CA, et al. Unique characteristics of systemic sclerosis sine scleroderma-associated interstitial lung disease. *Chest* 2006;130:976-981.
22. Mahler M, Raijmakers R. Novel aspects of autoantibodies to the PM/Scl complex: clinical, genetic and diagnostic insights. *Autoimmun Rev* 2007;6:432-437.
23. Wesierska-Gadek J, Klima A, Komina O, et al. Characterization of Autoantibodies against Components of the Nuclear Pore Complexes: High Frequency of Anti-p62 Nucleoporin Antibodies. *Ann NY Acad Sci* 2007;1109:519–30.
24. Kraemer DM, Tony H-P. Nuclear Pore Protein p62 Autoantibodies in Systemic Lupus Erythematosus. *Open Rheumatol J* 2010;4:24-7.
25. Courvalin J-C, Lassoued K, Worman HJ, et al. Identification and Characterization of Autoantibodies Against the Nuclear Envelope Lamin B Receptor from Patients with Primary Biliary Cirrhosis. *J Exp Med* 1990;172:961-7.
26. Ou Y, Enarson P, Rattner JB, et al. The nuclear pore complex protein Tpr is a common autoantigen in sera that demonstrate nuclear envelope staining by indirect immunofluorescence. *Clin Exp Immunol* 2004;136:379–87.
27. Takeuchi K, Kaneda K, Kawakami I, et al. Autoantibodies recognizing proteins copurified with PCNA in patients with connective tissue diseases. *Mol Biol Rep* 1996;23:243-6.
